# Supplementary material for: Survival and Neurological Outcomes Following Corpectomy for Spinal Metastatic Disease: A Single Institutional Experience
Source: Preprints.org preprint supplement (doi:10.20944/preprints202402.0069.v1), 2024-02-01
Supplement: Supplementary file 1 [file supplementary]

**Supplemental Table 1.** Preoperative Tumor Embolization Characteristics

| **Characteristic** | **Value** | **P-value** |
| --- | --- | --- |
| Preoperative embolization, n (%) | 22 (34.9) |  |
| Primary cancer, n (%) |  |  |
| Renal cell carcinoma | 20 (90.9) |  |
| Head and neck cancer | 1 (4.5) |  |
| Thyroid cancer | 1 (4.5) |  |
| Preoperative ASIA Score, n (%) |  |  |
| D | 11 (50.0) |  |
| E | 11 (50.0) |  |
| Estimated blood loss (EBL) in mL, average ± SD |  | 0.9369 |
| RCC patients with preoperative embolization | 1835.8 ± 2119.4 |  |
| RCC patients without preoperative embolization | 4902.5 ± 10,786.4 |  |
| Spinal levels instrumented, median (range) | 5 (3-8) |  |
| Difference in EBL by number of spinal levels instrumented (< 5 versus ≥ 5 levels) |  | 0.1947 |
| Significant intraoperative bleeding (EBL ≥ 1000 mL), n (%) |  |  |
| RCC patients with preoperative embolization | 15 (78.9) |  |
| RCC patients without preoperative embolization | 9 (90.0) |  |
| Intraoperative blood transfusion, n (%) |  |  |
| RCC patients with preoperative embolization | 11 (57.9) |  |
| RCC patients without preoperative embolization | 6 (60.0) |  |
| Blood products transfused in mL, median (range) |  | 0.6328 |
| RCC patients with preoperative embolization | 650 (325-3850) |  |
| RCC patients without preoperative embolization | 1130 (600-7975) |  |
| Preoperative embolization duration in minutes, median (range) | 81 (46-297) |  |
| Cumulative preoperative embolization and surgery duration in minutes, median (range) | 351 (200-832) | 0.9018 |
| Cumulative procedure time in RCC patients in minutes, average ± SD | 431.7 ± 138.6 |  |
| Surgery duration in RCC patients without preoperative embolization in minutes, average ± SD | 490.3 ± 252.4 |  |
| Length of admission in days, median (range) |  | .0591 |
| RCC patients who received preoperative embolization | 5 (3-13) |  |
| RCC patients who did not receive preoperative embolization | 8 (4-14) |  |
